# Supplementary material for: Ultrasensitive detection of seventeen chemicals simultaneously using paper-based sensors
Source: Royal Society of Chemistry journal article supplement (doi:10.1039/c8qm00336j), 2018-01-01
Supplement: c8qm00336j1.pdf [file c8qm00336j1.pdf]

*Supporting information*

**Ultrasensitive detection of seventeen chemicals  
simultaneously using paper-based sensors**

**Monoclonal antibody preparation**

For preparing the anti-NR mAb, eight female BALB/c mice (6–8 weeks old) were prepared, and then immunized subcutaneously with NR-CMO-BSA. The process are as follows. The first immunizing does consisted of 100µg of antigen as an emulsion of PBS and FCA. Four sequential boosters were administered at 3-week intervals with 50µg of immunogen emulsified in FIA. After each booster, the serum collected from the tail vessel of each mouse were detected for the antibody specificity by ic-ELISA. The mouse with the highest title and the best specificity to DEX was chosen to inject intraperitoneally with 25µg of immunogen dissolved in 100µL normal saline. Myeloma cells were fused with the spleen cells collected from the BALB/c mouse whose antiserum had the lowest 50% inhibitory concentration ( $IC_{50}$ ) and the highest titer, using the standard procedure. The supernatant from the hybridoma was detected with an ic-ELISA. We subcloned the positive hybridoma showing the expected inhibition. After three rounds of subcloning with the limiting dilution method, we isolated the target cell strain producing the antibody that best inhibited NR. The strain was expanded, cultured, and injected intraperitoneally into 8–10-week-old BALB/c mice. The antibody was purified from the mouse ascites with the caprylic acid–ammonium sulfate precipitation method and dialyzed against PBS at 4 °C for 3 days. The anti-DEX mAb and the anti-HES mAb were produced similarly under their individually optimized conditions.

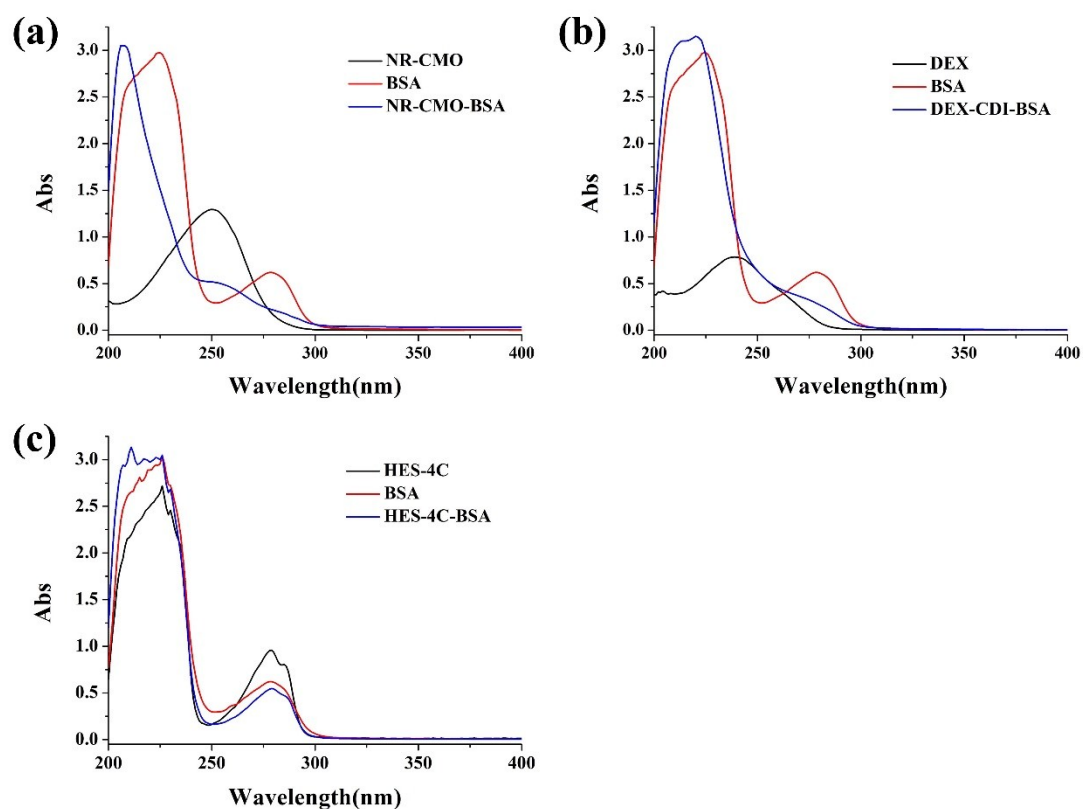

27

28 **Fig. S1** The UV spectra of coating antigens. (a) Confirmation of NR-CMO-BSA; (b)  
 29 Confirmation of DEX-CDI-BSA; (c) Confirmation of HES-4C-BSA.

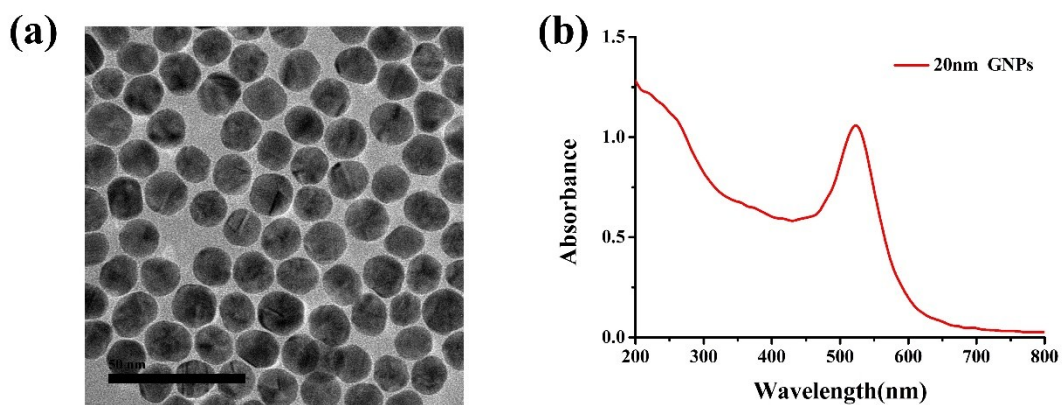

31  
32 **Fig. S2** Characterization of GNPs solution: (a) TEM images; (b) UV-visible spectra,  
33 and the maximum absorbance of GNPs solution is 523nm.

34

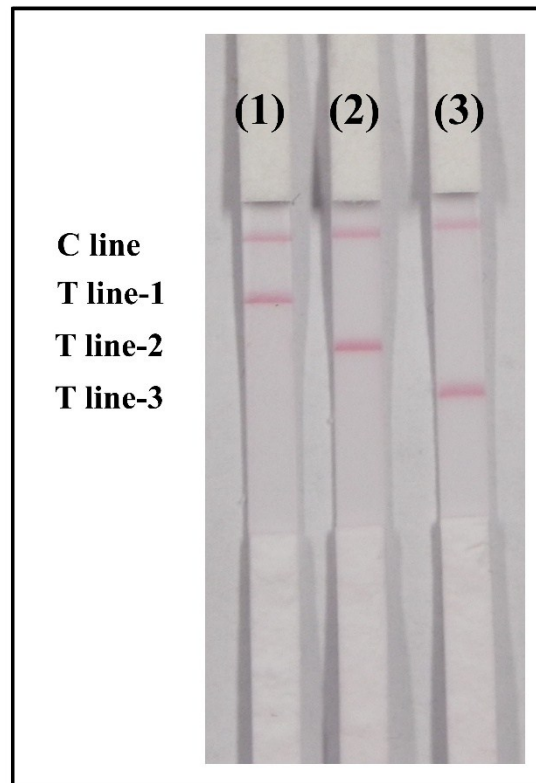

35  
 36 **Fig. S3** Specificity of each test line. (1) Only anti-NR mAb-GNP conjugates; (2) Only  
 37 anti-DEX mAb-GNP conjugates; (3) Only anti-HES mAb-GNP conjugates.

38

39 **Table S1: The abbreviation and its full name.**

| Abbreviation | Full name                                                                             |
|--------------|---------------------------------------------------------------------------------------|
| NR-CMO-BSA   | Nandrolone- Carboxymethoxylamine hemihydrochloride-<br>Bovine serum albumin conjugate |
| DEX-CDI-BSA  | Dexamethasone- N,N'-carbonyldiimidazole- Bovine serum<br>albumin conjugate            |
| HES-4C-BSA   | Hexestrol-4-bromobutyrate- Bovine serum albumin<br>conjugate                          |
| anti-NR-mAb  | The monoclonal antibody against Nandrolone and its<br>analogues                       |
| anti-DEX-mAb | The monoclonal antibody against Dexamethasone and its<br>analogues                    |
| anti-HES-mAb | The monoclonal antibody against Hexestrol and its<br>analogues                        |
| GNPs         | Colloidal gold nanoparticles                                                          |
| LC-MS        | Liquid chromatography–mass spectrometry                                               |

40
